# Supplementary material for: In situ production of a two-dimensional molybdenum disulfide/graphene hybrid nanosheet anode for lithium-ion batteries
Source: Royal Society of Chemistry journal article supplement (doi:10.1039/d0ra01503b), 2020-01-01
Supplement: d0ra01503b1.pdf [file d0ra01503b1.pdf]

**Electronic Supplementary Information (ESI)**

**In-situ production of two-dimensional molybdenum disulfide/graphene hybrid nanosheets  
anode for lithium-ion batteries**

Srikanth Mateti,<sup>a</sup> Md Mokhlesur Rahman,<sup>\*a</sup> Pavel Cizek<sup>a</sup> and Ying Chen<sup>\*a</sup>

<sup>a</sup>Institute for Frontier Materials, Deakin University, Geelong Campus, Waurn Ponds, 3216, Victoria,  
Australia.

**Corresponding authors:**

E-mail: m.rahman@deakin.edu.au; ian.chen@deakin.edu.au

**Table S1.** Electrochemical performances of the reported MoS<sub>2</sub>-based anode materials for lithium-ion batteries.

| Materials                                                | Cycling performance                |                                  | Method                    | Ref.      |
|----------------------------------------------------------|------------------------------------|----------------------------------|---------------------------|-----------|
|                                                          | Capacity<br>(mAh g <sup>-1</sup> ) | Current<br>(mA g <sup>-1</sup> ) |                           |           |
| 2D MoS <sub>2</sub> /graphene hybrid                     | 553                                | 250                              | Ball mill                 | This work |
| MoS <sub>2</sub> /graphene heterostructure               | 786                                | 100                              | Hydrothermal              | 21        |
| MoS <sub>2</sub> -rGO composites                         | 908                                | 100                              | Microwave annealing       | 22        |
| MoS <sub>2</sub> -RGO composites                         | 896                                | 50                               | Supercritical methanol    | 23        |
| Layer-by-layer MoS <sub>2</sub> /rGO hybrids             | 940                                | 100                              | Intercalation exfoliation | 24        |
| MoS <sub>2</sub> /graphene hybrids                       | 800                                | 100                              | heat-treatment            | 25        |
| MoS <sub>2</sub> /graphene hybrid nanosheets             | 902                                | 100                              | Hydrothermal              | 26        |
| Monodispersed MoS <sub>2</sub> hierarchical architecture | 839                                | 100                              | Hydrothermal              | 27        |
| MoS <sub>2</sub> /graphene nanocomposite                 | 767                                | 100                              | Hydrothermal              | 28        |
| Hierarchical MoS <sub>2</sub> /G composite               | 1077                               | 100                              | Hydrothermal              | 29        |

## References

- 21 H. Liu, X. Chen, L. Deng, X. Su, K. Guo and Z. Zhu, *Electrochim. Acta*, 2016, **206**, 184.
- 22 D.H. Young, C. Jo, J.Y. Kim, J. Lee and J.S. Lee, *J. Power Sources*, 2015, **295**, 228.
- 23 M. Choi, S.K. Koppala, D. Yoon, J. Hwang, S.M. Kim and J. Kim, *J. Power Sources*, 2016, **309**, 202.

- 24 Y. Jing, E.O. Ortiz-Quiles, C.R. Cabrera, Z. Chen and Z. Zhou, *Electrochim. Acta*, 2014, **147**, 392.
- 25 S. Srivastava, B. Kartick, S. Choudhury and M. Stamm, *Mater. Chem. Phys.*, 2016, **183**, 383.
- 26 X. Zhang, Q. Zhang, Y. Sun, P. Zhang, X. Gao, W. Zhang and J. Guo, *Electrochim. Acta*, 2016, **189**, 224.
- 27 L. Xu, L. Ma, T. Rujirala, B. Liu, J. Zhang and W. Zhang, *Nanotechnology*, 2019, **30**, 415402.
- 28 L. Chen, F. Chen, N. Tronganh, M. Lu and Y. Jiang, *J. Mater. Res.*, 2016, **31**, 3151.
- 29 Y. Teng, H. Zhao, Z. Zhang, Z. Li, Q. Xia, Y. Zhang, L. Zhao, X. Du, Z. Du, P. Lv and K. Świerczek, *ACS Nano*, 2016, **10**, 8526.
